# Supplementary figures and images for: Telemedicine use in current urologic oncology clinical practice
Source: Frontiers journal article supplement (doi:10.3389/fsurg.2022.885260), 2022-08-19

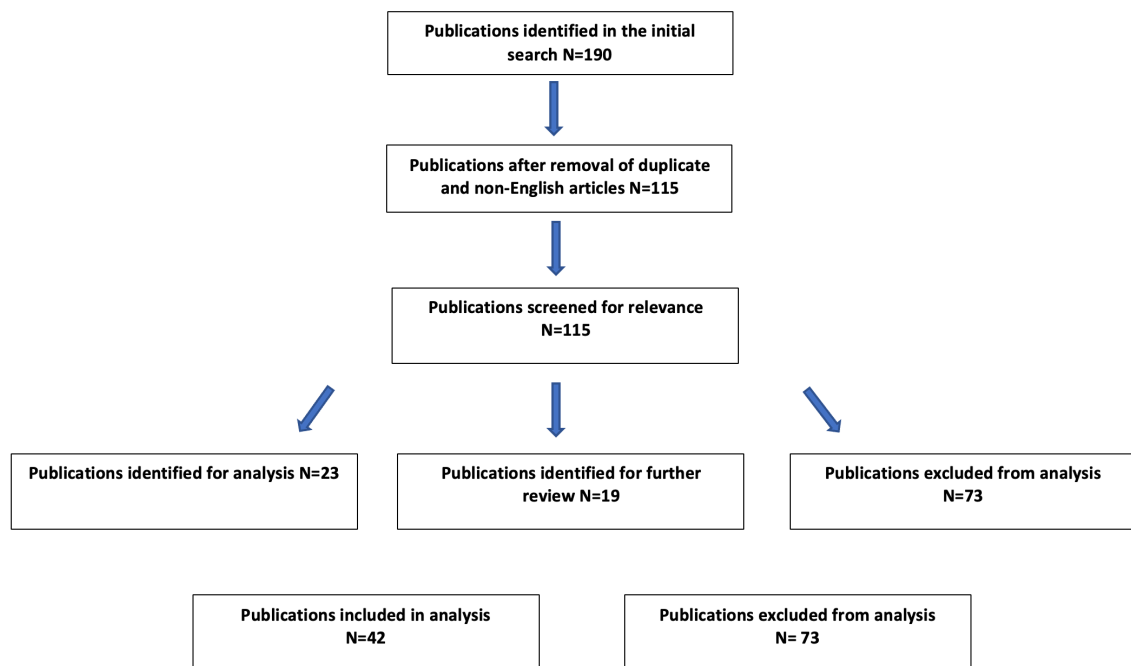

**Fig.1.** Literature search methodology.

Supplement: Data_Sheet_2.PDF [file Data_Sheet_2.PDF]
